# Supplementary material
Source: MDPI journal article supplement (https://www.mdpi.com/2571-6255/6/11/440)
Supplement: s1 [file s1 › fire-2627398-supplementary.pdf]

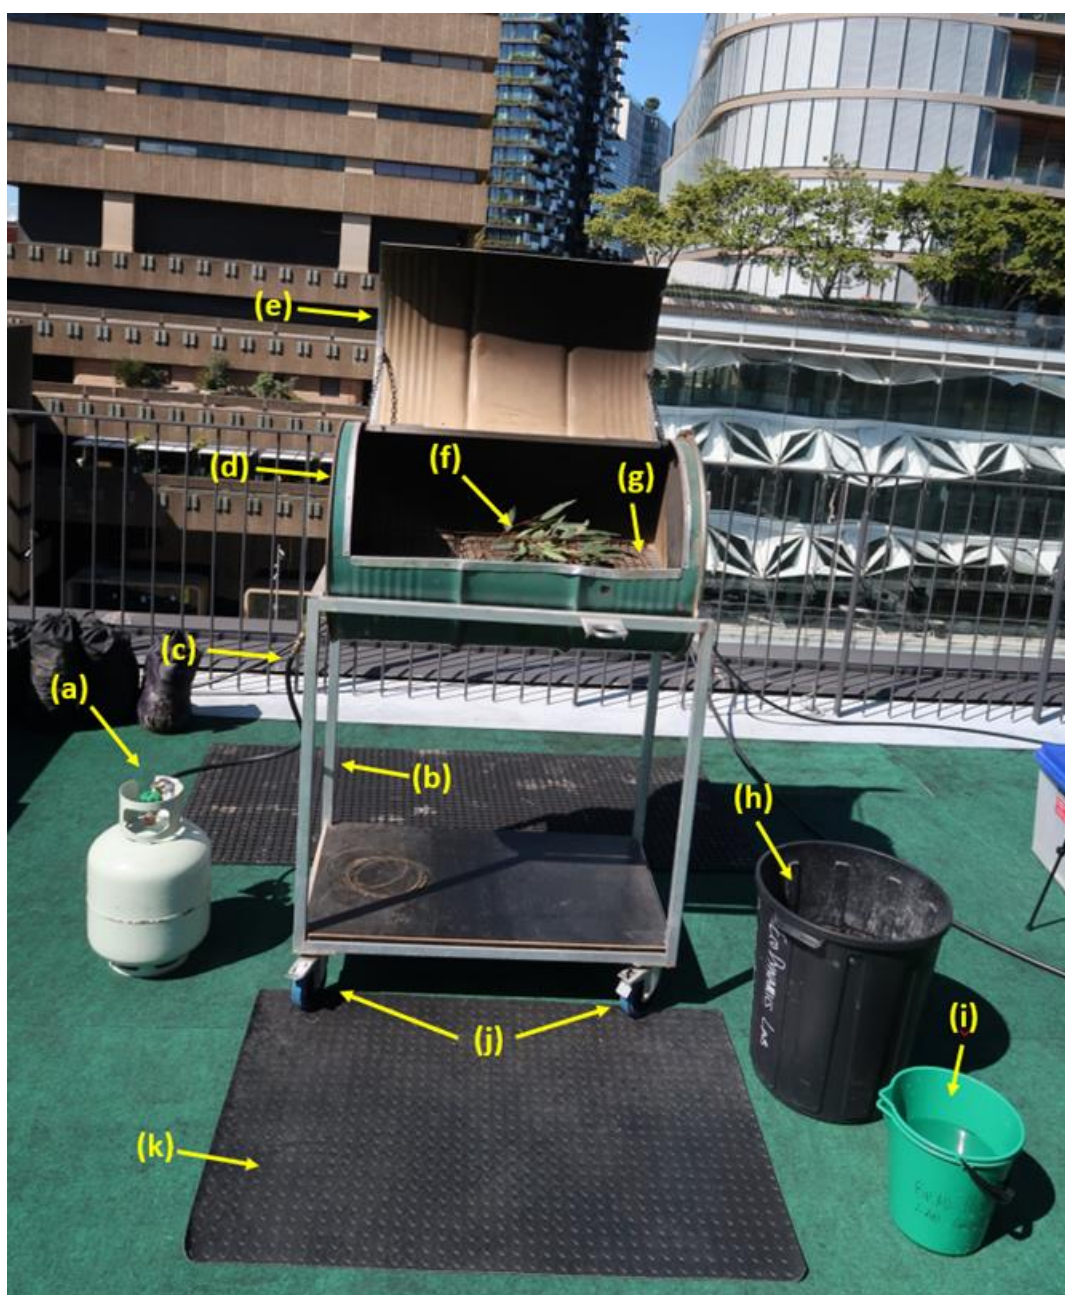

**Supplementary File S1.** Diagram of the typical set-up for the flammability testing device used to test shoot flammability in this study. (a) 8.5kg LPG gas cylinder, (b) movable stand, (c) gas flow tap, (d) body of barbeque, (e) lid of barbeque which is used as wind protection, (f) shoot placement example, (g) grill bed above burners, (h) bin filled with water to place burnt shoot samples, (i) spare bucket of water in case of emergency, (j) lockable wheels on stand, and (k) heat resistant mat.
